# Supplementary material
Source: MDPI journal article supplement (https://www.mdpi.com/2311-5637/8/12/718)
Supplement: s1 [file s1]

## Supplementary Tables

**Table S1.** Loading vectors of first principal component (PC1) and second principal component (PC2)

| Compound                | PC1   | PC2   |
|-------------------------|-------|-------|
| Ethyl Acetate           | -0.16 | -0.01 |
| Ethyl Isobutyrate       | -0.13 | 0.20  |
| Ethyl butanoate         | -0.17 | 0.05  |
| Isoamyl Acetate         | -0.07 | 0.26  |
| Ethyl pentanoate        | -0.16 | 0.01  |
| Isoamyl alcohol         | -0.18 | -0.03 |
| Ethyl hexanoate         | -0.17 | 0.10  |
| Hexyl acetate           | -0.08 | 0.26  |
| Ethyl lactate           | -0.15 | 0.01  |
| Hexanol                 | -0.15 | -0.15 |
| Trans-3-hexen-1-ol      | -0.18 | -0.02 |
| Ethyl heptanoate        | -0.05 | -0.23 |
| Cis-3-hexen-1-ol        | -0.17 | 0.00  |
| 1-heptanol              | -0.09 | -0.25 |
| Ethyl Octanoate         | -0.18 | 0.06  |
| Benzaldehyde            | -0.15 | -0.04 |
| Ethyl decanoate         | -0.17 | 0.09  |
| Phenylethyl alcohol     | -0.17 | -0.08 |
| Acetic Acid             | 0.18  | 0.04  |
| Isobutyric Acid         | -0.16 | 0.14  |
| Butanoic Acid           | -0.18 | 0.00  |
| Isovaleric Acid         | -0.18 | 0.00  |
| 2-methylbutanoic Acid   | -0.16 | 0.12  |
| Hexanoic Acid           | -0.18 | 0.03  |
| Octanoic Acid           | -0.12 | 0.22  |
| Isobutyl Acetate        | -0.06 | 0.27  |
| Ethyl-2-methyl butyrate | -0.14 | 0.17  |
| 2-Methyl Butyl Acetate  | -0.07 | 0.26  |
| trans-2-Hexen-1-ol      | -0.16 | -0.01 |
| Octyl Acetate           | -0.17 | 0.05  |
| Linalool                | -0.18 | 0.00  |
| 1-Octanol               | -0.12 | -0.22 |
| Diethyl Succinate       | -0.15 | -0.14 |
| Citronellol             | -0.16 | -0.12 |
| Nerol                   | -0.16 | -0.14 |
| 2-Phenylethyl Acetate   | -0.07 | 0.26  |
| beta-Damascenone        | -0.13 | 0.20  |
| Guaiacol                | -0.16 | -0.09 |
| Geraniol                | -0.18 | -0.04 |
| alpha-Ionone            | -0.08 | -0.24 |
| Ethyl Hydrocinnamate    | -0.16 | -0.11 |
| beta-Ionone             | -0.11 | -0.23 |
| Phenol                  | -0.09 | -0.20 |
| 4-Ethylguaiacol         | -0.16 | 0.02  |
| Ethyl Cinnamate         | -0.17 | -0.03 |
| Eugenol                 | -0.15 | -0.12 |

## Supplementary Figures

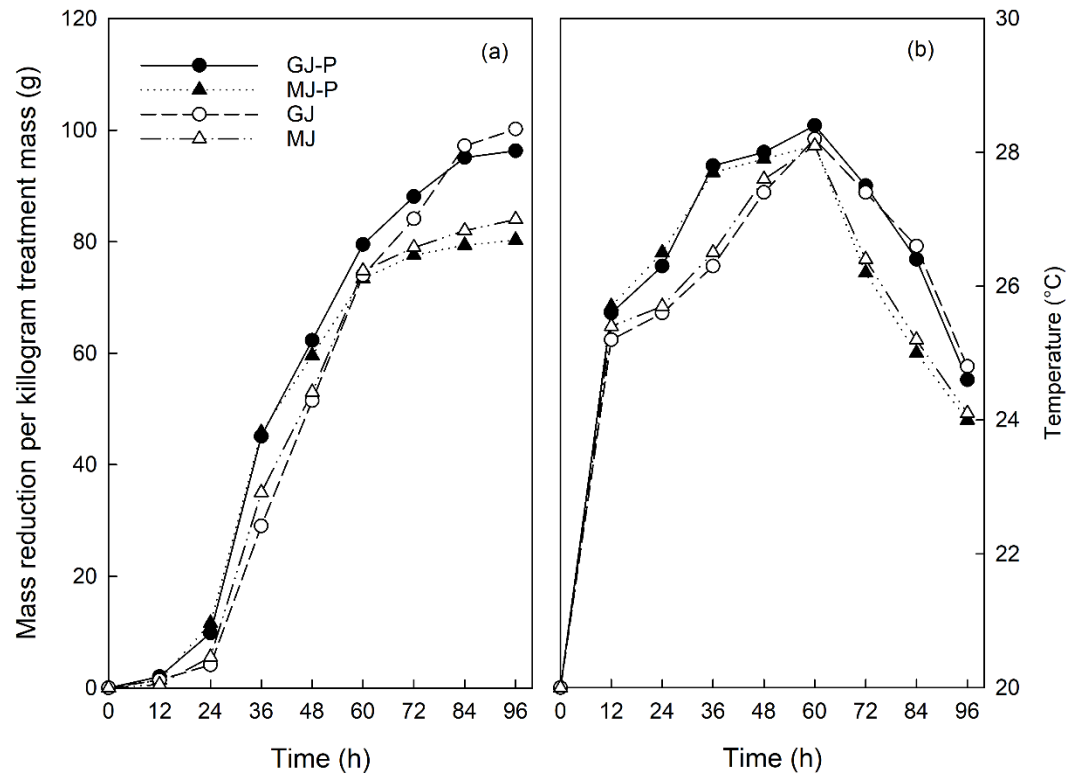

**Figure S1.** Fermentation curves: **(a)** total mass reduction of the ferments; **(b)** must temperature fluctuation during fermentation. GJ-P, grape juice plus pomace ( $\lambda$ ); MJ-P, model juice plus pomace ( $\pi$ ); GJ, grape juice ( $\bullet$ ); MJ, model juice ( $\Delta$ ).
